# Supplementary material for: A New Estimate of the Glomerular Sieving Coefficient for Retinol-Binding Protein 4 Suggests It Is Not Freely Filtered
Source: PubMed Central journal article supplement — Kidney Int Rep. 2019 Apr 29;4(7):1017–8. doi: 10.1016/j.ekir.2019.04.017 (PMC6662157; doi:10.1016/j.ekir.2019.04.017), 2019-04-29
Supplement: mmc1.pdf [file mmc1.pdf]

## Supplementary Material

### Supplementary References

Supplementary information is available at *KI Report's* website.

### Supplementary Methods

Supplementary information is available at *KI Report's* website.

## Supplementary Methods

Use of patient urine samples was in accordance with Addenbrooke's Hospital Research and Development Committee rules. Urine samples from patients with Dent1 disease were stored in liquid nitrogen for up to 14 years before analysis and thawed only once. Measurements of UfRBP4 and creatinine were performed as described previously<sup>9</sup>. Results from some of the patients reported here were included in previously described grouped results for inherited RFS<sup>9</sup>.

Calculation of the GSC for fRBP4 was based on the previous model<sup>8</sup>. The value of the median UfRBP4 expressed as mg/mmol creatinine was multiplied by 14.7 mmol to approximate 24 hr excretion<sup>S8</sup> and then divided by 179 L (being 124 mL/min x60x24/1,000)<sup>S9</sup> to approximate 24 hr GFR. The resulting value, representing the concentration of fRBP4 in mg/L in the glomerular ultrafiltrate, was then divided by the established value for normal mean plasma fRBP4, 5.8 mg/L, to estimate the GSC of fRBP4.

To determine the molar concentrations of fRBP4 and albumin in the glomerular ultrafiltrate, the respective normal plasma concentrations in  $\mu\text{mol/L}$  (mg/L) of 0.276, (5.8) and 687, (45,000) are multiplied by the estimated GSCs of 0.097 and  $7.7 \times 10^{-5}$ , respectively<sup>8</sup>. This yields the glomerular ultrafiltrate molar concentrations of fRBP4 and albumin as 26.8 and 52.9

nmol/L, respectively. The total molar concentration of protein in the glomerular ultrafiltrate, calculated from the GSC of fRBP4 estimated here and the other values previously reported, is 314 nmol/l so the mole% of fRBP4 and albumin are 8.5% and 16.8%, respectively.

### Supplementary References

- S1. Gorvin CM, Wilmer MJ, Piret SE, et al. Receptor-mediated endocytosis and endosomal acidification is impaired in proximal tubule epithelial cells of Dent disease patients. *Proc Natl Acad Sci.* 2013;110(17):7014-7019.
- S2. Devuyst O, Thakker RV. Dent's disease. *Orphanet J Rare Dis.* 2010;5:28.
- S3. Christensen EI, Devuyst O, Dom G, et al. Loss of chloride channel ClC-5 impairs endocytosis by defective trafficking of megalin and cubilin in kidney proximal tubules. *Proc Natl Acad Sci.* 2003;100(14):8472-8477.
- S4. Nielsen R, Christensen EI, Birn H. Megalin and cubilin in proximal tubule protein reabsorption: from experimental models to human disease. *Kidney Int.* 2016;89(1):58-67.
- S5. Mori KP, Yokoi H, Kasahara M, et al. Increase of Total Nephron Albumin Filtration and Reabsorption in Diabetic Nephropathy. *J Am Soc Nephrol JASN.* 2017;28(1):278-289.
- S6. Satchell SC, Tooke JE. What is the mechanism of microalbuminuria in diabetes: a role for the glomerular endothelium? *Diabetologia.* 2008;51(5):714-725.
- S7. Stehouwer CDA, Smulders YM. Microalbuminuria and risk for cardiovascular disease: Analysis of potential mechanisms. *J Am Soc Nephrol JASN.* 2006;17(8):2106-2111.
- S8. Junge W, Wilke B, Halabi A, Klein G. Determination of reference intervals for serum creatinine, creatinine excretion and creatinine clearance with an enzymatic and a modified Jaffé method. *Clin Chim Acta.* 2004;344(1-2):137-148.
- S9. Berg UB. Differences in decline in GFR with age between males and females. Reference data on clearances of inulin and PAH in potential kidney donors. *Nephrology Dialysis Transplantation.* 2006;21(9):2577-2582.
